# Supplementary material
Source: ML conference proceedings conference paper supplement (https://aclanthology.org/2026.semeval-1.281)

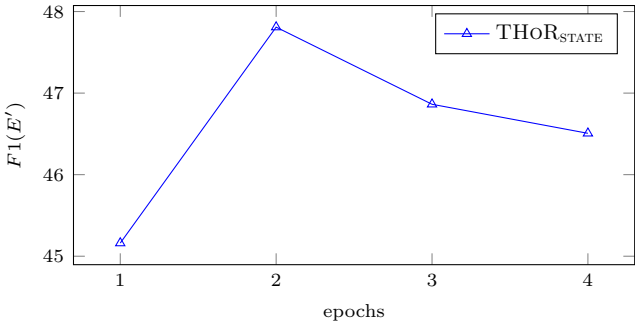

Supplement: SupplementaryMaterial [file image_pretraining_plot.pdf › legacy/plots/image_pretraining_plot.pdf]

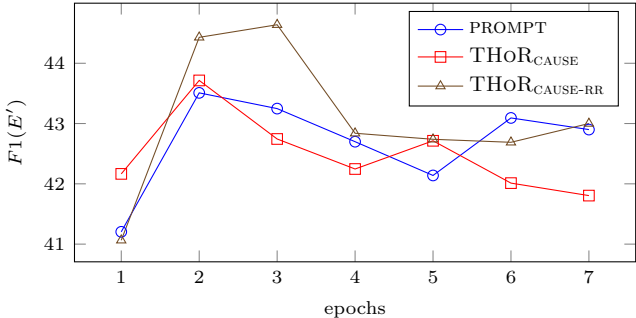

Supplement: SupplementaryMaterial [file image_training_plot.pdf › legacy/plots/image_training_plot.pdf]
